# Supplementary material
Source: Springer Nature journal article supplement (https://www.springermedizin.de/resource/supplementary/12879_2007_593_MOESM4_ESM.pdf/9449338)

**A**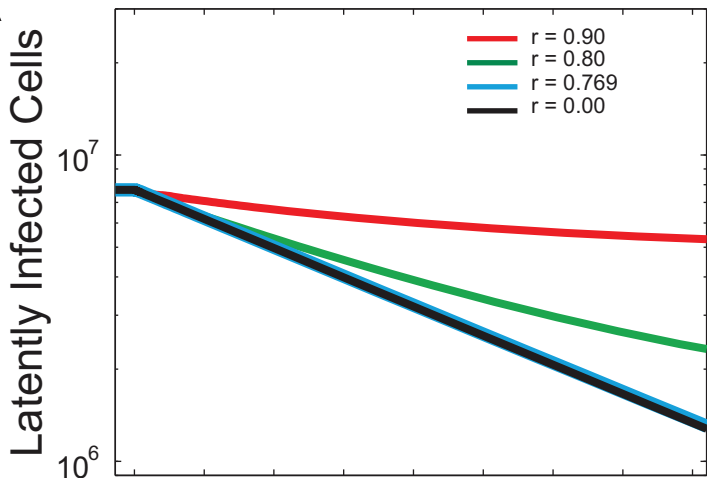**B**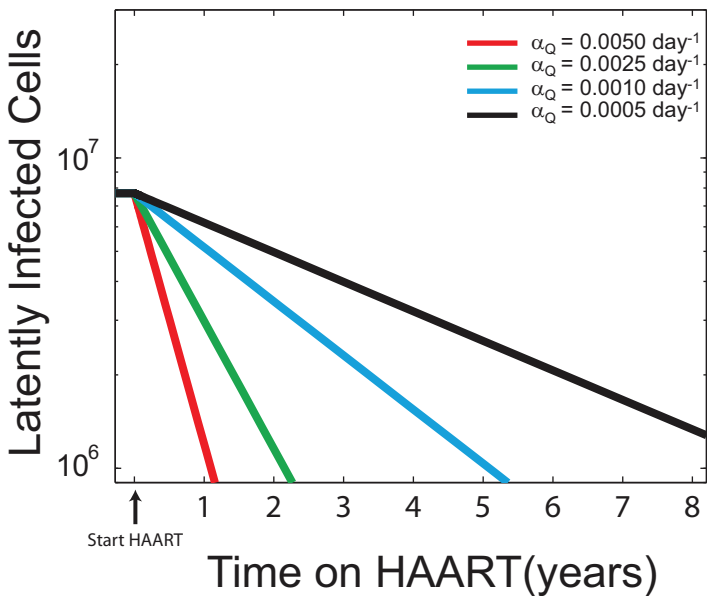

Supplement: MOESM4 [file 9449338]
